# Supplementary material
Source: Research Square preprint supplement (doi:10.21203/rs.3.rs-9678329/v1)
Supplement: Supplementary file 1 [file 29d67d27589f75eacb2d3552.docx]

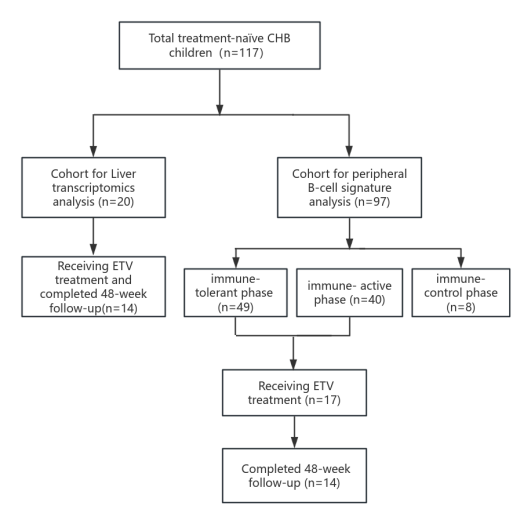


Supplementary figure 1. Patients Enrollment and Follow-up Flowchart.

**
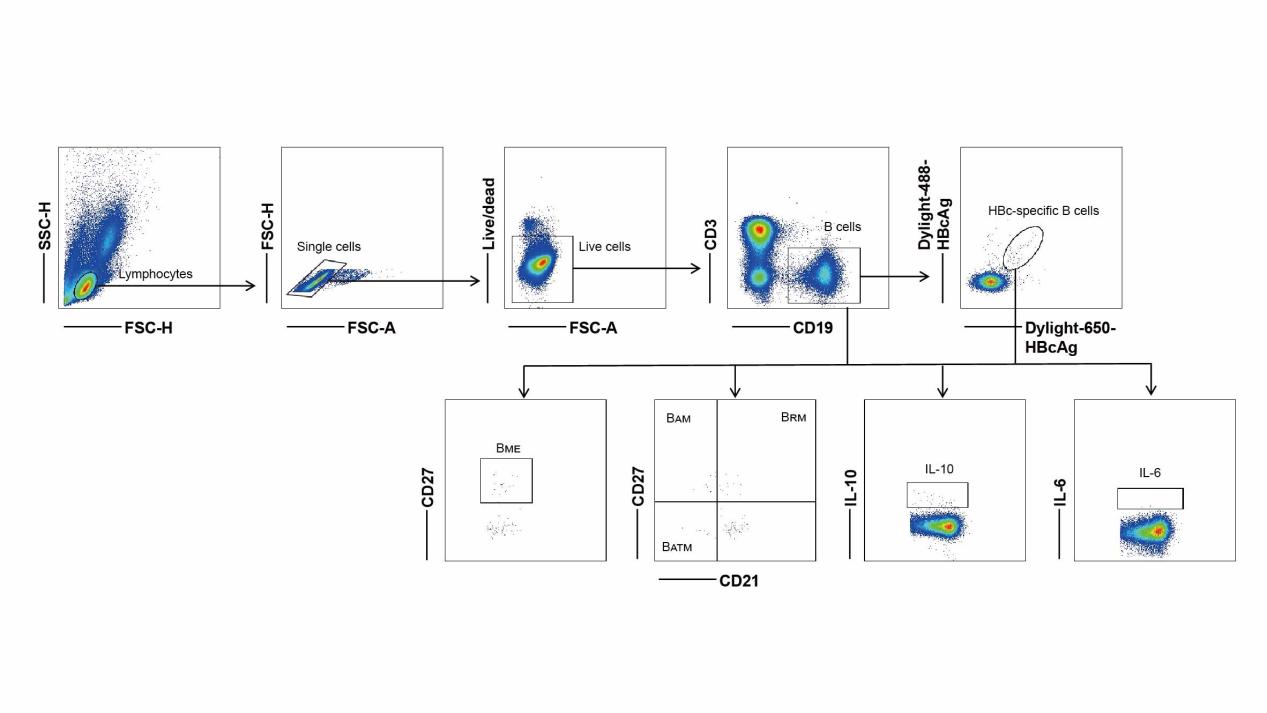
**

Supplementary figure 2. Flow cytometry gating strategy of peripheral circulating total B and HBc-B cells.

BME, memory B cells; BRM, resting memory B cells; BAM, activated memory B cells; BATM, atypical memory B cells.

**
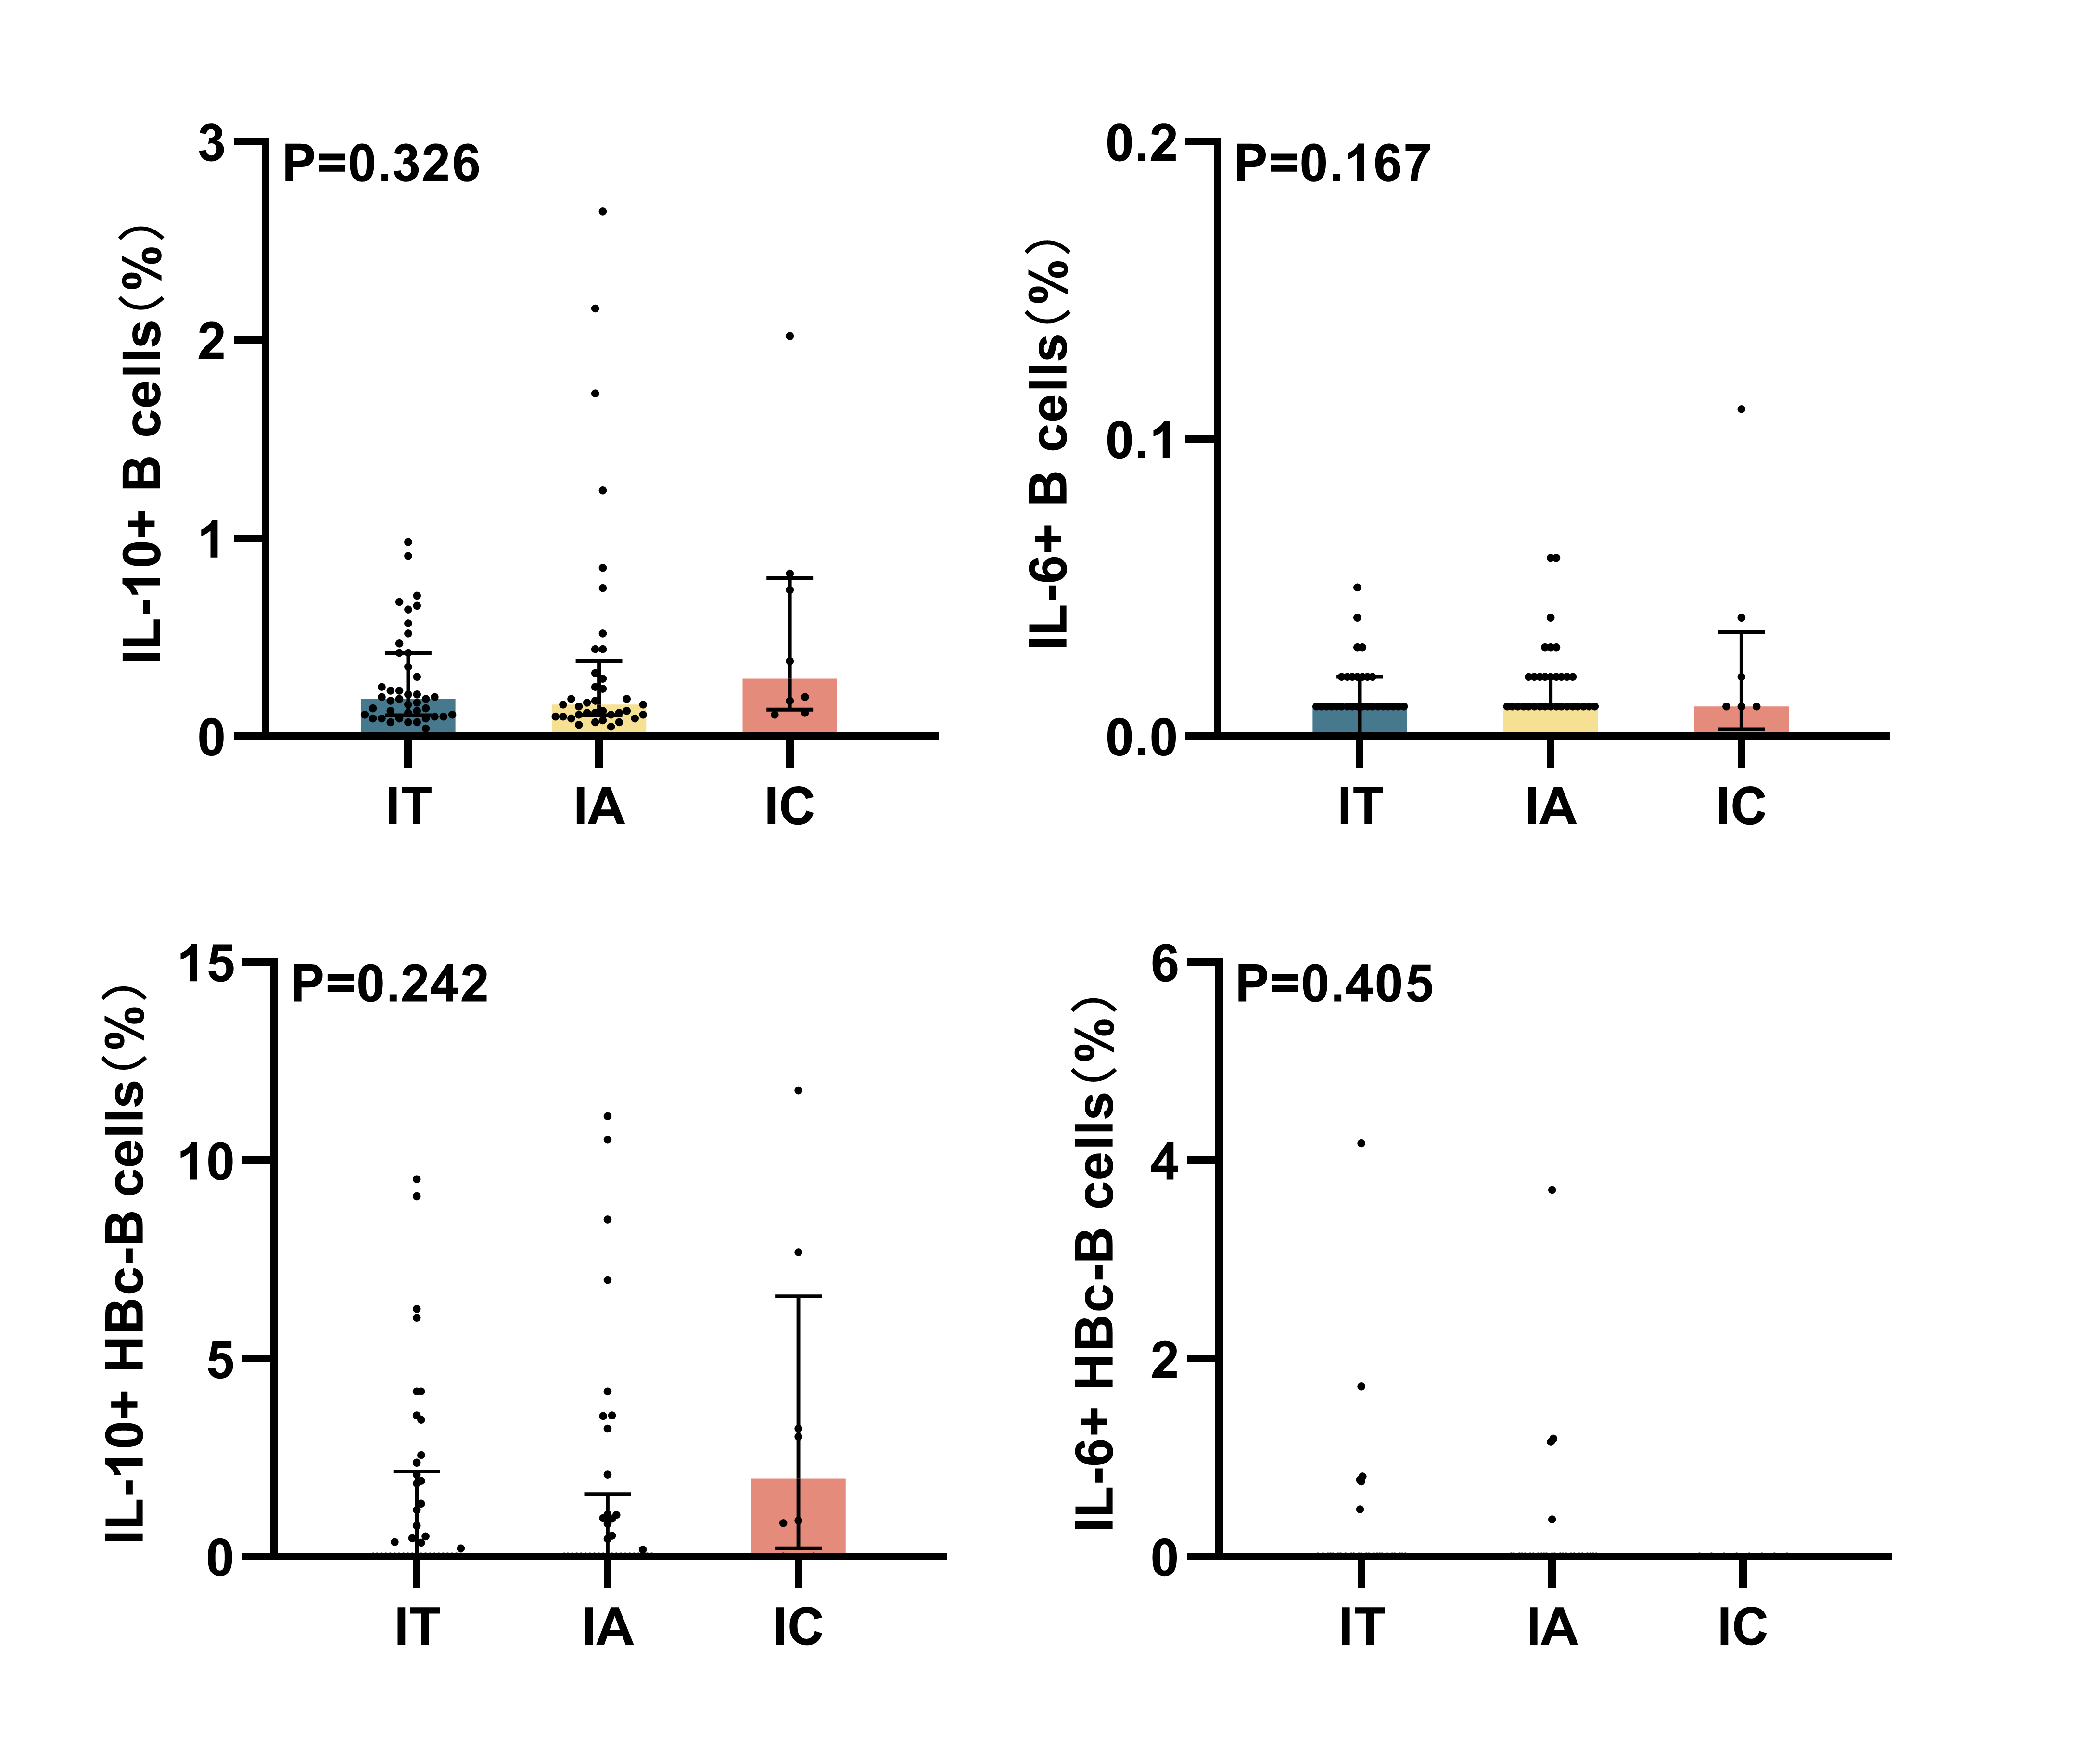
**

Supplementary figure 3. Percentages of IL-10+ and IL-6+ B cells or HBc-B cells in IT, IA, or IC CHB children.

**
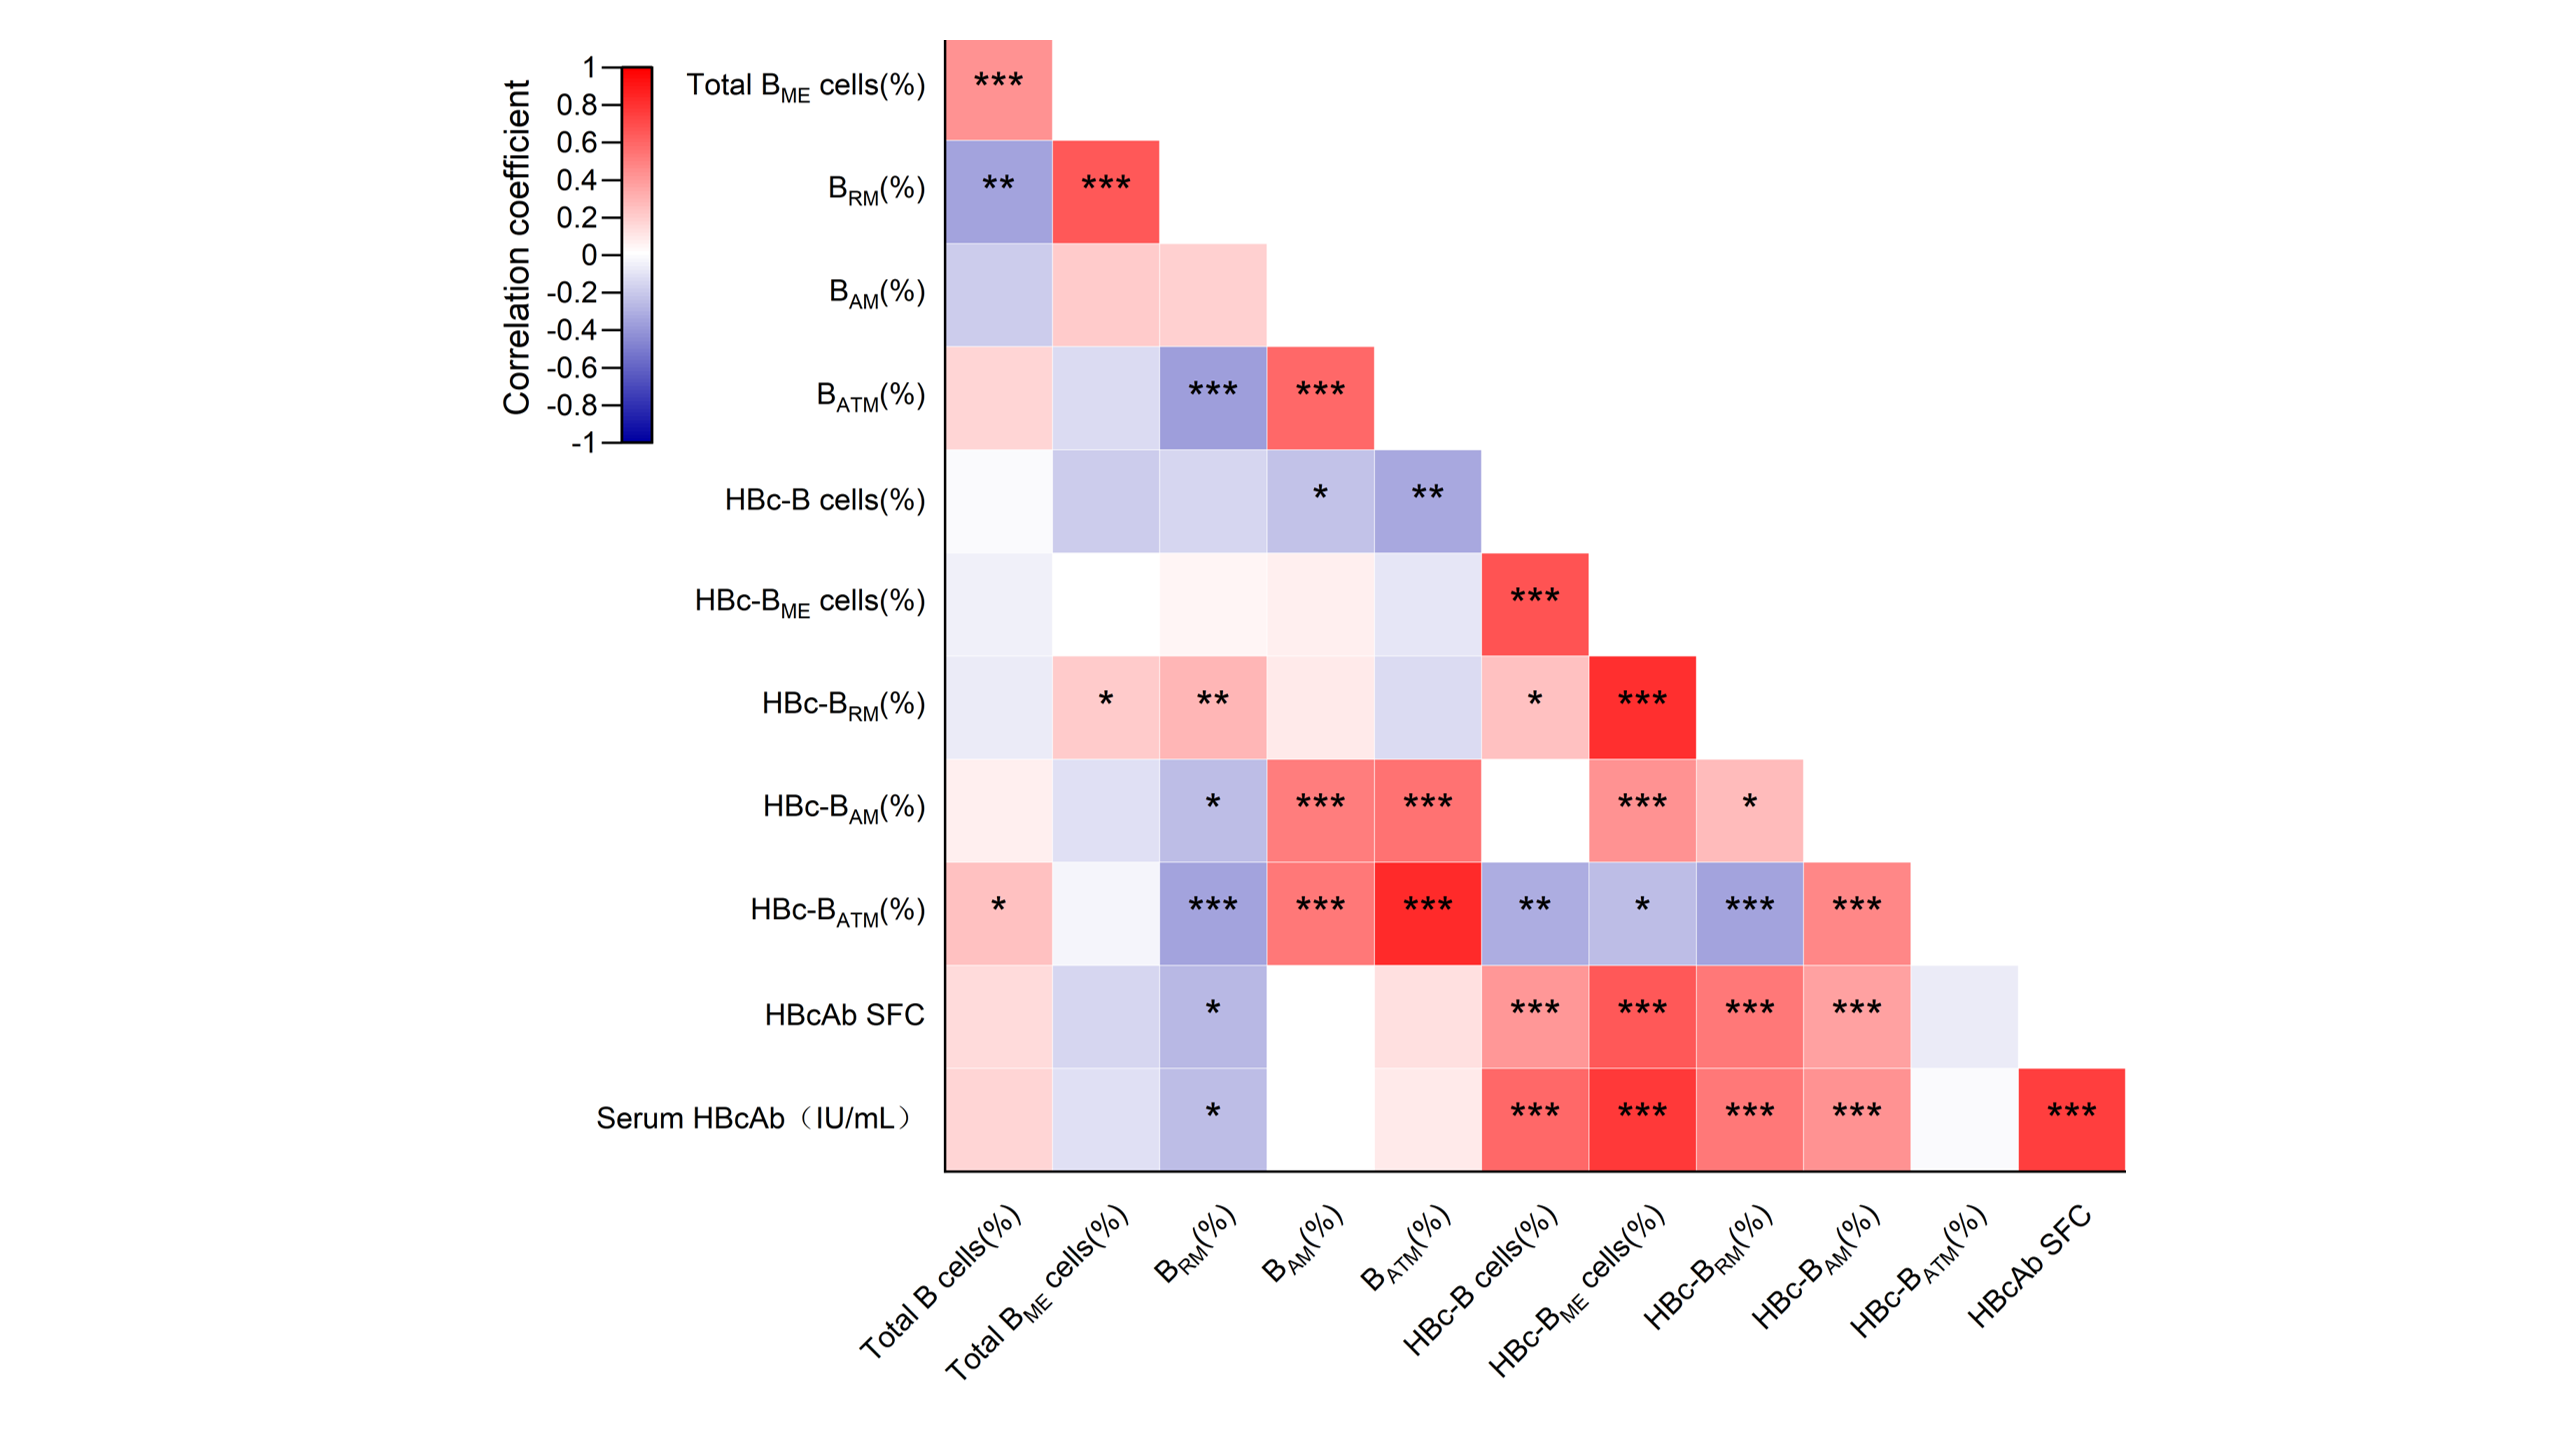
**

Supplementary figure 4. Correlation analysis among total B cells, HBc-B cells, their subsets, HBcAb SFC, and HBcAb levels.

**Supplementary table 1. Laboratory parameters of 14 CHB children included in liver transcriptome analysis at baseline and at week 48 after antiviral therapy with Entecavir**

| Patient  ID | Age (years) | Sex | The grade of liver inflammation  (G) | The stage of liver fibrosis  (S) | At baseline | | | |  | At week 48 of Entecavir treatment | | | |
| --- | --- | --- | --- | --- | --- | --- | --- | --- | --- | --- | --- | --- | --- |
| ALT (×ULN) | HBV DNA  (log10 IU/mL) | HBsAg  (log10 IU/mL) | HBeAg  (log10 s/co) |  | ALT (×ULN) | HBV DNA  (log10 IU/mL) | HBsAg  (log10 IU/mL) | HBeAg  (log10 s/co) |
| P01 | 10 | boy | 2 | 2 | 9.28 | 8.01 | 4.59 | 3.00 |  | 0.65 | < LLOQ | 3.29 | 1.53 |
| P02 | 10 | girl | 1 | 1 | 1.50 | 6.08 | 2.30 | 2.89 |  | 0.55 | < LLOQ | 1.32 | 1.96 |
| P03 | 16 | boy | 1 | 1 | 2.03 | 7.99 | 4.62 | 3.01 |  | 0.70 | 4.31 | 4.13 | 2.56 |
| P04 | 9 | girl | 1 | 2 | 3.30 | 8.16 | 4.70 | 2.93 |  | 0.53 | < LLOQ | 3.49 | 1.00 |
| P05 | 12 | girl | 1 | 2 | 7.18 | 8.04 | 4.06 | 3.06 |  | 0.55 | < LLOQ | 1.56 | 0.81 |
| P06 | 7 | girl | 1 | 1 | 4.55 | 8.46 | 4.25 | 3.02 |  | 0.43 | < LLOQ | 3.44 | 0.60 |
| P07 | 4 | girl | 1 | 1 | 3.43 | 7.53 | 4.27 | 3.07 |  | 1.58 | < LLOQ | 3.88 | 2.83 |
| P08 | 3 | boy | 1 | 1 | 1.83 | 8.46 | 4.67 | 3.09 |  | 0.38 | < LLOQ | -2.00 | -0.17 |
| P09 | 12 | girl | 1 | 2 | 3.83 | 7.84 | 4.10 | 1.73 |  | 0.50 | < LLOQ | 3.72 | -0.42 |
| P10 | 3 | boy | 2 | 2 | 2.08 | 6.96 | 2.90 | 3.14 |  | 0.63 | 2.77 | 3.13 | 2.56 |
| P11 | 6 | boy | 2 | 2 | 7.73 | 7.56 | 4.00 | 3.18 |  | 0.35 | < LLOQ | 2.28 | -0.39 |
| P12 | 3 | girl | 1 | 1 | 0.50 | 8.36 | 4.73 | 3.21 |  | 0.58 | 4.92 | 4.58 | 3.10 |
| P13 | 9 | girl | 2 | 1 | 4.55 | 7.18 | 1.47 | 3.16 |  | 0.35 | < LLOQ | -2.00 | 0.64 |
| P14 | 4 | boy | 2 | 1 | 1.88 | 7.19 | 4.35 | 3.17 |  | 0.50 | < LLOQ | 1.71 | -0.24 |

ALT, alanine aminotransferase; HBV, hepatitis B virus; HBsAg, Hepatitis B surface antigen; HBeAg, Hepatitis B e antigen; IU, international unit; LLOQ, lower limit of quantitation of HBV DNA (400 IU/mL); ULN, upper limit of normal (40 U/L); s/co, signal-to-cutoff ratio

**Supplementary table 2. Laboratory parameters of 14 CHB children included in the analysis of peripheral HBc-B cells at baseline and at week 12 and 48 after anti-viral therapy with Entecavir**

|  |  |  | At baseline | | | |  | At week 12 of Entecavir treatment | | | |  | At week 48 of Entecavir treatment | | | |
| --- | --- | --- | --- | --- | --- | --- | --- | --- | --- | --- | --- | --- | --- | --- | --- | --- |
| Patient ID | Age (years) | Sex | ALT (×ULN) | HBV DNA  (log10 IU/mL) | HBsAg  (log10 IU/mL) | HBeAg  (log10 s/co) | ALT (×ULN) | HBV DNA  (log10 IU/mL) | HBsAg  (log10 IU/mL) | HBeAg  (log10 s/co) | ALT (×ULN) | HBV DNA  (log10 IU/mL) | HBsAg  (log10 IU/mL) | HBeAg  (log10 s/co) |
| P01 | 12 | girl | 3.13 | 7.84 | 4.10 | 2.45 |  | 0.55 | 3.46 | 3.74 | 0.72 |  | 0.50 | < LLOQ | 3.72 | -0.42 |
| P02 | 12 | girl | 0.75 | 7.97 | 4.04 | 1.43 |  | 0.45 | 3.27 | 3.67 | 0.33 |  | 0.45 | < LLOQ | 3.57 | 0.44 |
| P03 | 6 | girl | 1.50 | 6.00 | 3.52 | 2.05 |  | 0.58 | 2.60 | 3.52 | -0.27 |  | 0.53 | < LLOQ | 3.65 | -0.42 |
| P04 | 10 | boy | 1.58 | 9.29 | 5.10 | 2.96 |  | 1.80 | 4.43 | 4.96 | 2.82 |  | 0.73 | 3.91 | 4.46 | 2.93 |
| P05 | 7 | girl | 2.83 | 7.37 | 3.81 | 2.83 |  | 0.75 | 2.60 | 3.90 | 2.74 |  | 1.75 | < LLOQ | 3.78 | 2.32 |
| P06 | 13 | boy | 5.45 | 8.21 | 3.97 | 1.37 |  | 1.83 | 3.35 | 3.30 | 0.03 |  | 1.23 | < LLOQ | 3.33 | -0.28 |
| P07 | 8 | boy | 1.33 | 8.00 | 4.33 | 2.83 |  | 1.83 | 3.16 | 4.36 | 2.80 |  | 2.88 | < LLOQ | 3.61 | 2.84 |
| P08 | 11 | boy | 2.20 | 8.73 | 4.57 | 2.83 |  | 0.88 | 4.20 | 4.48 | 2.81 |  | 1.28 | 3.61 | 4.29 | 2.95 |
| P09 | 5 | boy | 2.25 | 4.86 | 2.38 | 0.06 |  | 1.00 | 2.60 | 2.98 | 0.36 |  | 1.60 | < LLOQ | 0.38 | 0.87 |
| P10 | 15 | girl | 1.73 | 8.07 | 4.59 | 2.72 |  | 1.10 | 4.30 | 4.41 | 2.85 |  | 1.45 | 3.25 | 4.14 | 2.64 |
| P11 | 3 | girl | 1.75 | 6.12 | 3.12 | 3.08 |  | 1.35 | 2.60 | 3.10 | 2.83 |  | 0.95 | < LLOQ | 3.07 | 2.90 |
| P12 | 4 | girl | 1.33 | 7.81 | 3.85 | 3.10 |  | 1.13 | 3.00 | 3.21 | 2.82 |  | 0.53 | < LLOQ | 2.32 | -0.40 |
| P13 | 12 | girl | 1.20 | 8.43 | 4.99 | 2.92 |  | 0.73 | 4.94 | 4.77 | 2.79 |  | 0.68 | 3.32 | 4.47 | 2.92 |
| P14 | 11 | girl | 1.80 | 8.22 | 4.93 | 2.86 |  | 0.73 | 3.45 | 4.79 | 2.71 |  | 0.55 | 3.73 | 4.49 | 2.92 |

ALT, alanine aminotransferase; HBV, hepatitis B virus; HBsAg, Hepatitis B surface antigen; HBeAg, Hepatitis B e antigen; IU, international unit; LLOQ, lower limit of quantitation of HBV DNA (400 IU/mL); ULN, upper limit of normal (40 U/L); s/co, signal-to-cutoff ratio
