# Supplementary material
Source: Research Square preprint supplement (doi:10.21203/rs.3.rs-9678329/v1)
Supplement: Supplementary file 2 [file bb1d872eabc0b3b71e76661d.docx]

Dear Editors,

We would like to submit the enclosed manuscript entitled “***Stronger HBc-specific B cell activity in chronic HBV-infected children with higher liver inflammatory grade and better antiviral therapy response***” to “***Journal of Translational Medicine***” as a research article.

Existing studies on the immunopathogenesis of chronic hepatitis B (CHB) have been mainly focused on adult patients, while there is still a lack of related reports on pediatric patients. Therefore, this study aimed to explore the immunological mechanisms contributing to the development of liver inflammation in pediatric CHB patients. By hepatic transcriptome, we first revealed a significant increase in intrahepatic B cell in pediatric patients with significant liver inflammation. And we further demonstrated that higher frequency of HBc-specific B cells and HBcAb levels were observed in CHB children during immune active phase, and positively correlated to liver inflammation grade and antiviral therapy efficacy. For the first time, our findings highlight the hepatic B-cell activation in pediatric CHB patients and offer novel insights into the potential role of HBc-B cells in triggering hepatic inflammation in children with chronic HBV infection. We think our study would attract great interest from readers in this field.

We confirm that this manuscript has not been published or submitted for publication elsewhere, either completely or in part, or in another form or language. All authors have approved the manuscript and agree with the submission. There are no conflict of interest and no ethical/legal conflicts involved in the article. Experiments using human materials were approved by authorities. We look forward to hearing from you at your earliest convenience.

Thank you for your consideration.

Sincerely,

Min Chen, Ph.D.

Professor

Department of Infectious Diseases, Institute for Viral Hepatitis, The Second Affiliated Hospital, Chongqing Medical University, Chongqing, China

Phone: +86-023-63893707

mchen@hospital.cqmu.edu.cn
